# Supplementary material for: Investigating population continuity with ancient DNA under a spatially explicit simulation framework
Source: PubMed Central journal article supplement (PMC5731203; doi:10.1186/s12863-017-0575-6), 2017-12-15

Neolithic (Low density) → Present (High density)

Panmictic model

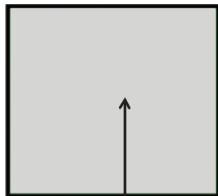

*(single location)*  
*ancient samples*  
*(precise locations)*

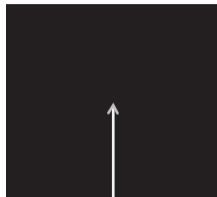

*(single location)*  
*modern samples*  
*(precise locations)*

Spatial model

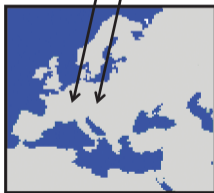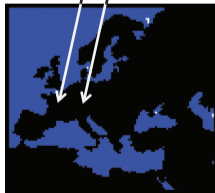

Supplement: 12863_2017_575_MOESM1_ESM.pdf [file 12863_2017_575_MOESM1_ESM.pdf]
